# Supplementary material
Source: MDPI journal article supplement (https://www.mdpi.com/2073-4433/12/5/557)
Supplement: s1 [file s1]

# Supplementary Materials: Double high-level ozone and PM<sub>2.5</sub> co-pollution episodes in Shanghai, China: pollution characteristics and significant role of daytime HONO *Atmosphere* 2021

Kejing Yang<sup>1</sup>, Lingdong Kong<sup>1,2,\*</sup>, Songying Tong<sup>1</sup>, Jiandong Shen<sup>3</sup>, Lu Chen<sup>1</sup>, Shengyan Jin<sup>1</sup>, Chao Wang<sup>1</sup>, Fei Sha<sup>4</sup>, Lin Wang<sup>1</sup>

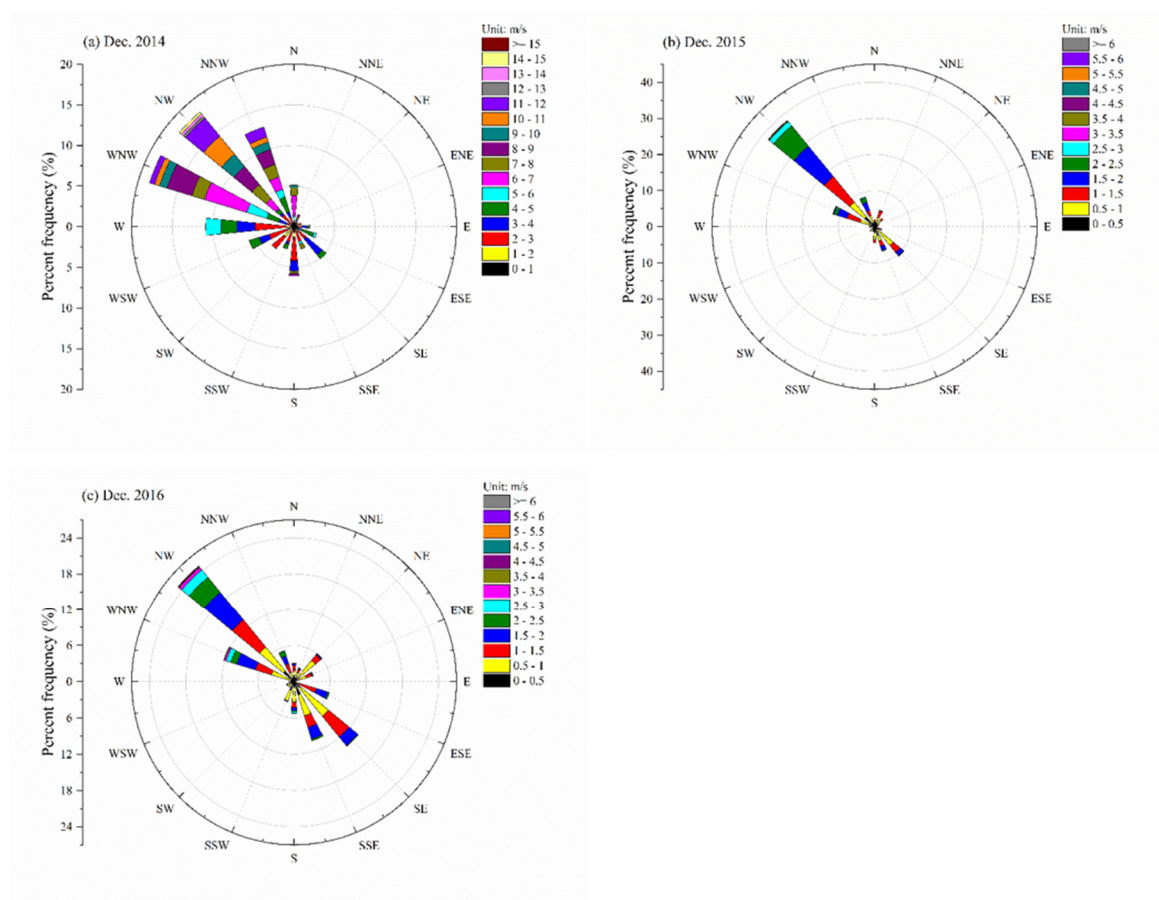

**Figure S1.** Wind speed and directions at the observation site in December of 2014–2016.

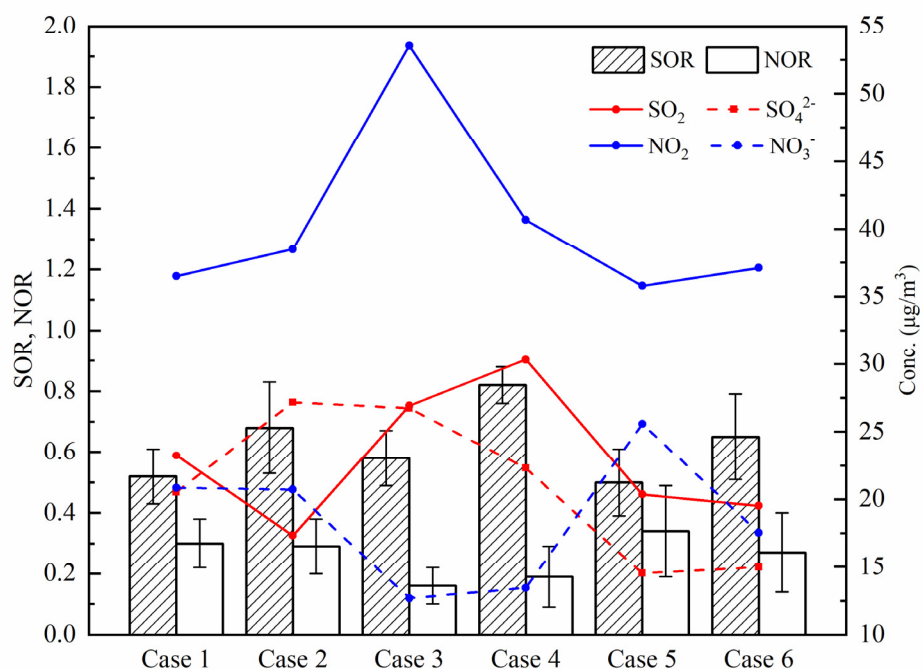

**Figure S2.** Variations of SOR, NOR, SO<sub>2</sub>, NO<sub>2</sub>, SO<sub>4</sub><sup>2-</sup>, and NO<sub>3</sub><sup>-</sup> in different double high-level O<sub>3</sub> and PM<sub>2.5</sub> pollution cases.

**Table S1.** Statistics of meteorological parameters during the observation period from 2014–2016.

| Year | Month | T    | RH   | Rainfall | Rain Days | Sun Hours | Mean daily sunshine hours | Month | Year |
|------|-------|------|------|----------|-----------|-----------|---------------------------|-------|------|
| 2014 | Apr.  | 15.0 | 79.7 | 139.4    | 11        | 119.9     | 6.3                       | Apr.  | 2014 |
|      | May   | 20.5 | 73.6 | 61.5     | 10        | 186.2     | 8.9                       | May   |      |
|      | Jun.  | 22.8 | 83.7 | 175.9    | 12        | 74.1      | 4.1                       | Jun.  |      |
|      | Jul.  | 26.8 | 86.3 | 192.2    | 16        | 129.4     | 8.6                       | Jul.  |      |
|      | Aug.  | 26.2 | 85.4 | 229.3    | 18        | 84.1      | 6.5                       | Aug.  |      |
|      | Sep.  | 24.2 | 81.6 | 196.0    | 12        | 118.0     | 6.6                       | Sep.  |      |
|      | Oct.  | 20.1 | 72.1 | 37.3     | 3         | 208.6     | 7.5                       | Oct.  |      |
|      | Nov.  | 15.0 | 73.9 | 34.6     | 11        | 128.8     | 6.8                       | Nov.  |      |
|      | Dec.  | 6.2  | 61.6 | 5.8      | 5         | 177.6     | 6.8                       | Dec.  |      |
| 2015 | Jan.  | 6.4  | 72.2 | 61.1     | 9         | 119.0     | 5.4                       | Jan.  | 2015 |
|      | Feb.  | 7.0  | 73.7 | 81.1     | 10        | 102.3     | 5.7                       | Feb.  |      |
|      | Mar.  | 10.4 | 76.5 | 96.4     | 15        | 130.5     | 8.2                       | Mar.  |      |
|      | Apr.  | 15.1 | 74.1 | 108.9    | 12        | 169.8     | 9.4                       | Apr.  |      |
|      | May   | 19.5 | 79.6 | 131.4    | 12        | 169.7     | 8.9                       | May   |      |
|      | Jun.  | 24.4 | 75.9 | 486.4    | 18        | 77.0      | 6.4                       | Jun.  |      |
|      | Jul.  | 26.3 | 74.2 | 173.1    | 16        | 108.3     | 7.2                       | Jul.  |      |
|      | Aug.  | 28.1 | 72.2 | 125.6    | 11        | 162.3     | 8.1                       | Aug.  |      |
|      | Sep.  | 24.8 | 69.0 | 140.5    | 9         | 138.3     | 6.6                       | Sep.  |      |
|      | Oct.  | 20.7 | 63.7 | 49.3     | 7         | 158.2     | 6.6                       | Oct.  |      |
|      | Nov.  | 14.8 | 75.7 | 113.9    | 21        | 62.7      | 7.0                       | Nov.  |      |
|      | Dec.  | 9.1  | 66.8 | 81.4     | 12        | 95.7      | 5.0                       | Dec.  |      |
| 2016 | Jan.  | 6.2  | 66.8 | 78.6     | 15        | 98.5      | 6.2                       | Jan.  | 2016 |
|      | Feb.  | 8.0  | 56.4 | 23.1     | 4         | 181.0     | 7.2                       | Feb.  |      |
|      | Mar.  | 11.6 | 63.5 | 49.3     | 6         | 152.5     | 6.1                       | Mar.  |      |
|      | Apr.  | 16.9 | 71.9 | 142.7    | 15        | 137.9     | 9.2                       | Apr.  |      |
|      | May   | 21.0 | 72.7 | 159.5    | 19        | 139.1     | 11.6                      | May   |      |
|      | Jun.  | 24.4 | 80.4 | 239.2    | 20        | 98.5      | 9.9                       | Jun.  |      |
|      | Jul.  | 30.0 | 74.6 | 166.8    | 14        | 178.3     | 10.5                      | Jul.  |      |
|      | Aug.  | 29.8 | 69.6 | 32.4     | 7         | 268.2     | 11.2                      | Aug.  |      |
|      | Sep.  | 25.5 | 73.9 | 291.6    | 13        | 137.6     | 8.1                       | Sep.  |      |
|      | Oct.  | 21.4 | 78.4 | 296.0    | 19        | 49.3      | 4.1                       | Oct.  |      |
|      | Nov.  | 14.6 | 75.3 | 69.0     | 13        | 101.6     | 6.0                       | Nov.  |      |
|      | Dec.  | 10.5 | 70.0 | 48.9     | 9         | 126.1     | 5.7                       | Dec.  |      |

\*Note: average for ambient temperature (T, °C), relative humidity (RH, %); accumulated monthly value for precipitation (rainfall, mm), rain days (d), and sun hours (h).

**Table S2.** Summary of meteorological factors and chemical species data in the double low-level O<sub>3</sub> and PM<sub>2.5</sub> pollution cases.

| Parameter/species                                           | Case 1        | Case 2        | Case 3        | Average       |
|-------------------------------------------------------------|---------------|---------------|---------------|---------------|
| PM <sub>2.5</sub> (μg/m <sup>3</sup> )                      | 28.9±15.6     | 46.9±30.9     | 45.2±24.3     | 43.5±25.4     |
| O <sub>3</sub> (μg/m <sup>3</sup> )                         | 61.0±26.1     | 58.6±26.0     | 69.7±26.2     | 66.5±26.5     |
| SO <sub>2</sub> (μg/m <sup>3</sup> )                        | 14.96±5.53    | 24.93±7.73    | 15.36±8.19    | 17.11±8.67    |
| NO (μg/m <sup>3</sup> )                                     | 10.67±16.16   | 8.56±7.32     | 5.46±11.39    | 6.79±11.62    |
| NO <sub>2</sub> (μg/m <sup>3</sup> )                        | 48.79±22.49   | 44.76±24.9    | 35.13±20.06   | 38.67±21.96   |
| CO (μg/m <sup>3</sup> )                                     | 532.11±240.32 | 826.81±200.55 | 722.63±342.67 | 718.81±318.89 |
| NO <sub>x</sub> (μg/m <sup>3</sup> )                        | 65.08±39.98   | 57.74±31.49   | 39.90±27.16   | 46.43±31.38   |
| K <sup>+</sup> (μg/m <sup>3</sup> )                         | 1.24±0.21     | 1.19±0.39     | 0.59±0.35     | 0.78±0.45     |
| Ca <sup>2+</sup> (μg/m <sup>3</sup> )                       | 0.14±0.07     | 0.09±0.09     | 0.18±0.25     | 0.16±0.21     |
| Na <sup>+</sup> (μg/m <sup>3</sup> )                        | 0.33±0.04     | 0.48±0.19     | 0.10±0.09     | 0.20±0.19     |
| Mg <sup>2+</sup> (μg/m <sup>3</sup> )                       | 0.10±0.07     | 0.08±0.06     | 0.05±0.06     | 0.07±0.06     |
| Cl <sup>-</sup> (μg/m <sup>3</sup> )                        | 0.95±0.66     | 1.71±1.57     | 1.54±1.12     | 1.50±1.19     |
| NO <sub>3</sub> <sup>-</sup> (μg/m <sup>3</sup> )           | 6.54±3.97     | 12.48±11.18   | 12.82±9.54    | 11.97±9.58    |
| SO <sub>4</sub> <sup>2-</sup> (μg/m <sup>3</sup> )          | 5.93±2.69     | 7.67±3.96     | 7.92±4.15     | 7.63±4.00     |
| NH <sub>4</sub> <sup>+</sup> (μg/m <sup>3</sup> )           | 3.66±2.21     | 6.42±4.81     | 7.52±4.39     | 6.83±4.44     |
| HONO (ppbv)                                                 | 1.10±0.46     | 0.76±0.52     | 0.83±0.57     | 0.85±0.55     |
| HONO (ppbv)<br>daytime                                      | 1.05±0.53     | 0.53±0.42     | 0.83±0.57     | 0.74±0.54     |
| SIA (μg/m <sup>3</sup> )                                    | 16.12±8.74    | 26.57±19.22   | 28.27±16.44   | 26.43±16.70   |
| TWSI (μg/m <sup>3</sup> )                                   | 18.88±9.29    | 30.13±20.97   | 30.73±17.26   | 29.13±17.65   |
| SIA/TWSI                                                    | 0.84±0.05     | 0.86±0.06     | 0.91±0.04     | 0.89±0.06     |
| TWSI/PM <sub>2.5</sub>                                      | 0.68±0.10     | 0.66±0.14     | 0.69±0.12     | 0.65±0.12     |
| SIA/PM <sub>2.5</sub>                                       | 0.57±0.08     | 0.57±0.14     | 0.63±0.12     | 0.61±0.13     |
| NO <sub>3</sub> <sup>-</sup> /SO <sub>4</sub> <sup>2-</sup> | 1.06±0.29     | 1.52±1.05     | 1.64±0.84     | 1.55±0.86     |
| SOR                                                         | 0.54±0.10     | 0.23±0.06     | 0.50±0.26     | 0.48±0.24     |
| NOR                                                         | 0.09±0.03     | 0.2±0.11      | 0.22±0.09     | 0.19±0.10     |
| Temp (°C)                                                   | 14.2±3.2      | 2.4±2.9       | 9.4±5.0       | 8.1±5.1       |
| RH (%)                                                      | 74.9±11.0     | 60.0±15.8     | 57.9±21.8     | 60.4±20.4     |
| WS (m/s)                                                    | 4.2±2.0       | 1.3±0.6       | 1.5±0.7       | 1.5±1.0       |
| Vis (km)                                                    | 18.5±7.2      | 8.9±1.8       | 15.3±9.0      | 16.7±9.1      |

**Table S3.** The correlation of ambient air pollutants and meteorological parameters in each double high-level pollution case.

| Case   | Parameter                              | O <sub>3</sub> | PM <sub>2.5</sub> | NO <sub>2</sub> | NO       | T        | RH       |
|--------|----------------------------------------|----------------|-------------------|-----------------|----------|----------|----------|
| Case 1 | O <sub>3</sub> (ppb)                   | 1              | 0.474*            | -0.378          | -0.299   | 0.865**  | -0.904** |
|        | PM <sub>2.5</sub> (μg/m <sup>3</sup> ) |                | 1                 | 0.339           | 0.426*   | 0.729**  | -0.632** |
|        | NO <sub>2</sub> (μg/m <sup>3</sup> )   |                |                   | 1               | 0.647**  | 0.091    | 0.041    |
|        | NO (μg/m <sup>3</sup> )                |                |                   |                 | 1        | 0.119    | 0.060    |
|        | T (°C)                                 |                |                   |                 |          | 1        | -0.964** |
|        | RH (%)                                 |                |                   |                 |          |          | 1        |
| Case 2 | O <sub>3</sub> (ppb)                   | 1              | 0.869**           | -0.351          | -0.435*  | 0.916**  | -0.854** |
|        | PM <sub>2.5</sub> (μg/m <sup>3</sup> ) |                | 1                 | -0.208          | -0.339   | 0.765**  | -0.744** |
|        | NO <sub>2</sub> (μg/m <sup>3</sup> )   |                |                   | 1               | 0.748**  | -0.012   | -0.116   |
|        | NO (μg/m <sup>3</sup> )                |                |                   |                 | 1        | -0.194   | 0.160    |
|        | T (°C)                                 |                |                   |                 |          | 1        | -0.970** |
|        | RH (%)                                 |                |                   |                 |          |          | 1        |
| Case 3 | O <sub>3</sub> (ppb)                   | 1              | 0.621**           | -0.579**        | -0.436*  | 0.864**  | -0.787** |
|        | PM <sub>2.5</sub> (μg/m <sup>3</sup> ) |                | 1                 | 0.115           | 0.427*   | 0.719**  | -0.635** |
|        | NO <sub>2</sub> (μg/m <sup>3</sup> )   |                |                   | 1               | 0.213    | -0.188   | 0.147    |
|        | NO (μg/m <sup>3</sup> )                |                |                   |                 | 1        | 0.266    | -0.175   |
|        | T (°C)                                 |                |                   |                 |          | 1        | -0.948** |
|        | RH (%)                                 |                |                   |                 |          |          | 1        |
| Case 4 | O <sub>3</sub> (ppb)                   | 1              | 0.828**           | -0.427*         | -0.416*  | 0.925**  | -0.919** |
|        | PM <sub>2.5</sub> (μg/m <sup>3</sup> ) |                | 1                 | -0.164          | -0.691** | 0.916**  | -0.810** |
|        | NO <sub>2</sub> (μg/m <sup>3</sup> )   |                |                   | 1               | 0.179    | -0.163   | 0.140    |
|        | NO (μg/m <sup>3</sup> )                |                |                   |                 | 1        | -0.556** | 0.438*   |
|        | T (°C)                                 |                |                   |                 |          | 1        | -0.965** |
|        | RH (%)                                 |                |                   |                 |          |          | 1        |
| Case 5 | O <sub>3</sub> (ppb)                   | 1              | -0.208            | -0.440**        | -0.488** | 0.696**  | -0.638** |
|        | PM <sub>2.5</sub> (μg/m <sup>3</sup> ) |                | 1                 | 0.225           | 0.124    | -0.512** | 0.394**  |
|        | NO <sub>2</sub> (μg/m <sup>3</sup> )   |                |                   | 1               | 0.377**  | -0.279*  | 0.243*   |
|        | NO (μg/m <sup>3</sup> )                |                |                   |                 | 1        | -0.412** | 0.439**  |
|        | T (°C)                                 |                |                   |                 |          | 1        | -0.934** |
|        | RH (%)                                 |                |                   |                 |          |          | 1        |
| Case 6 | O <sub>3</sub> (ppb)                   | 1              | 0.125             | -0.749**        | -0.787** | 0.751**  | -0.792** |
|        | PM <sub>2.5</sub> (μg/m <sup>3</sup> ) |                | 1                 | 0.127           | 0.042    | -0.278   | 0.171    |
|        | NO <sub>2</sub> (μg/m <sup>3</sup> )   |                |                   | 1               | 0.745**  | -0.416** | 0.426**  |
|        | NO (μg/m <sup>3</sup> )                |                |                   |                 | 1        | -0.537** | 0.556**  |
|        | T (°C)                                 |                |                   |                 |          | 1        | -0.954** |
|        | RH (%)                                 |                |                   |                 |          |          | 1        |

\* with significant value at  $p < 0.05$ . \*\* with significant value at  $p < 0.01$ .

**Table S4.** Summary of meteorological factors and chemical species data in the double high-level O<sub>3</sub> and PM<sub>2.5</sub> pollution cases during the daytime.

| Double<br>High<br>Case | SO <sub>4</sub> <sup>2-</sup> (μg/m <sup>3</sup> ) |             | NO <sub>3</sub> <sup>-</sup> (μg/m <sup>3</sup> ) |             | NH <sub>4</sub> <sup>+</sup> (μg/m <sup>3</sup> ) |            |
|------------------------|----------------------------------------------------|-------------|---------------------------------------------------|-------------|---------------------------------------------------|------------|
|                        | 6:00–18:00                                         | 8:00–16:00  | 6:00–18:00                                        | 8:00–16:00  | 6:00–18:00                                        | 8:00–16:00 |
| Case 1                 | 23.88±3.48                                         | 24.39±2.13  | 20.95±8.22                                        | 19.82±7.65  | 14.16±1.95                                        | 13.92±2.24 |
| Case 2                 | 32.59±10.23                                        | 34.61±7.93  | 20.91±4.67                                        | 21.55±4.60  | 17.81±3.81                                        | 18.46±2.89 |
| Case 3                 | 29.60±4.22                                         | 29.26±3.15  | 10.21±5.10                                        | 9.56±3.87   | 13.17±1.07                                        | 12.80±1.08 |
| Case 4                 | 26.62±11.53                                        | 28.11±11.51 | 10.88±6.31                                        | 9.62±4.47   | 14.24±6.07                                        | 14.29±5.47 |
| Case 5                 | 13.80±4.61                                         | 13.32±4.34  | 20.04±13.27                                       | 17.46±11.19 | 11.78±6.04                                        | 10.75±5.35 |
| Case 6                 | 13.52±4.59                                         | 13.03±4.51  | 14.67±10.18                                       | 14.10±9.95  | 9.64±4.54                                         | 9.25±4.71  |
| Average                | 20.13±9.81                                         | 20.26±10.03 | 16.93±10.64                                       | 15.68±9.43  | 12.66±5.30                                        | 12.24±5.14 |

  

| Double<br>High<br>Case | SIA (μg/m <sup>3</sup> ) |             | PM <sub>2.5</sub> (μg/m <sup>3</sup> ) |             | NH <sub>3</sub> (μg/m <sup>3</sup> ) |            |
|------------------------|--------------------------|-------------|----------------------------------------|-------------|--------------------------------------|------------|
|                        | 6:00–18:00               | 8:00–16:00  | 6:00–18:00                             | 8:00–16:00  | 6:00–18:00                           | 8:00–16:00 |
| Case 1                 | 59.00±8.10               | 58.12±9.20  | 105.5±9.8                              | 107.3±10.9  | 7.98±0.74                            | 7.94±0.77  |
| Case 2                 | 71.31±16.97              | 74.61±12.32 | 113.5±29.5                             | 119.56±23.5 | 10.28±2.99                           | 11.39±2.57 |
| Case 3                 | 52.98±4.24               | 51.62±4.36  | 102.3±9.0                              | 104.3±9.9   | 11.21±2.17                           | 11.60±1.91 |
| Case 4                 | 51.75±22.20              | 52.03±19.97 | 88.6±36.4                              | 88.3±32.9   | 18.32±0.93                           | 18.11±1.03 |
| Case 5                 | 45.62±23.39              | 41.52±20.47 | 87.4±37.8                              | 84.2±35.6   | 4.26±1.05                            | 4.28±0.91  |
| Case 6                 | 37.83±17.87              | 36.37±18.57 | 72.9±28.6                              | 71.9±30.4   | 5.54±0.73                            | 4.62±0.76  |
| Average                | 49.73±20.94              | 48.19±20.35 | 90.9±32.6                              | 90.7±32.1   | 7.74±4.80                            | 7.90±4.80  |

  

| Double<br>High Case | NO (μg/m <sup>3</sup> ) |             | NO <sub>2</sub> (μg/m <sup>3</sup> ) |             | CO (μg/m <sup>3</sup> ) |                |
|---------------------|-------------------------|-------------|--------------------------------------|-------------|-------------------------|----------------|
|                     | 6:00–18:00              | 8:00–16:00  | 6:00–18:00                           | 8:00–16:00  | 6:00–18:00              | 8:00–16:00     |
| Case 1              | 3.62±2.50               | 3.89±2.47   | 37.92±8.84                           | 38.00±10.21 | 851.15±92.29            | 901.67±51.40   |
| Case 2              | 5.77±6.52               | 5.67±6.96   | 41.54±15.26                          | 41.11±18.09 | 987.15±184.23           | 1066.22±80.35  |
| Case 3              | 16.08±36.24             | 20.44±43.43 | 56.69±31.33                          | 57.11±31.64 | 1071.08±339.15          | 1107.44±385.42 |
| Case 4              | 4.62±2.63               | 4.78±2.91   | 37.23±9.53                           | 34.89±9.73  | 812.62±109.17           | 810.78±87.46   |
| Case 5              | 4.49±4.98               | 3.82±3.88   | 32.20±14.29                          | 27.44±12.40 | 1105.74±404.75          | 1056.07±389.79 |
| Case 6              | 10.52±18.12             | 6.59±6.27   | 34.88±12.98                          | 32.00±11.42 | 958.31±232.57           | 949.78±248.64  |
| Average             | 7.15±15.36              | 6.60±15.37  | 37.78±17.36                          | 35.31±17.72 | 995.09±306.55           | 994.88±295.90  |

| Double<br>High<br>Case | SO <sub>2</sub> (μg/m <sup>3</sup> ) |             | O <sub>3</sub> (μg/m <sup>3</sup> ) |             | HONO (μg/m <sup>3</sup> ) |            |
|------------------------|--------------------------------------|-------------|-------------------------------------|-------------|---------------------------|------------|
|                        | 6:00–18:00                           | 8:00–16:00  | 6:00–18:00                          | 8:00–16:00  | 6:00–18:00                | 8:00–16:00 |
| Case 1                 | 28.62±6.40                           | 30.78±6.24  | 161.5±70.0                          | 176.6±65.1  | 1.15±0.38                 | 1.08±0.22  |
| Case 2                 | 24.85±8.50                           | 28.56±3.61  | 166.9±88.3                          | 192.0±79.9  | 2.00±1.48                 | 1.74±1.19  |
| Case 3                 | 36.54±44.52                          | 43.22±52.76 | 200.9±112.9                         | 230.4±103.9 | 2.21±1.76                 | 1.85±1.21  |
| Case 4                 | 28.15±2.58                           | 28.33±3.00  | 188.8±82.8                          | 200.6±77.6  | 4.26±1.81                 | 3.86±0.99  |
| Case 5                 | 21.82±8.07                           | 22.15±8.32  | 188.7±61.2                          | 199.9±47.9  | 1.16±0.75                 | 0.91±0.38  |
| Case 6                 | 22.17±5.88                           | 21.12±6.37  | 182.4±66.4                          | 199.4±54.3  | 1.48±1.60                 | 1.09±0.52  |
| Average                | 25.41±16.58                          | 26.90±19.09 | 183.2±75.3                          | 199.8±65.6  | 1.78±1.60                 | 1.49±1.15  |

| Double<br>High<br>Case | K <sup>+</sup> (μg/m <sup>3</sup> ) |            | Vis (km)   |            |
|------------------------|-------------------------------------|------------|------------|------------|
|                        | 6:00–18:00                          | 8:00–16:00 | 6:00–18:00 | 8:00–16:00 |
| Case 1                 | 1.16±0.09                           | 1.18±0.06  | 7.5±2.6    | 8.0±2.4    |
| Case 2                 | 1.70±0.44                           | 1.80±0.33  | 5.6±0.9    | 5.8±0.8    |
| Case 3                 | 1.59±0.21                           | 1.58±0.17  | 7.4±1.6    | 7.6±1.2    |
| Case 4                 | 1.05±0.11                           | 1.08±0.10  | 11.4±4.4   | 11.8±4.1   |
| Case 5                 | 0.50±0.26                           | 0.47±0.25  | 11.2±7.2   | 11.3±6.0   |
| Case 6                 | 0.46±0.17                           | 0.44±0.18  | 11.8±6.1   | 12.6±6.3   |
| Average                | 0.88±0.54                           | 0.88±0.55  | 9.8±5.7    | 10.2±5.3   |

| Double<br>High<br>Case | WS (m/s)   |            | T (°C)     |            | RH (%)     |            |
|------------------------|------------|------------|------------|------------|------------|------------|
|                        | 6:00–18:00 | 8:00–16:00 | 6:00–18:00 | 8:00–16:00 | 6:00–18:00 | 8:00–16:00 |
| Case 1                 | 3.4±0.9    | 3.3±0.7    | 22.3±3.8   | 23.8±2.4   | 63.7±15.6  | 58.6±9.4   |
| Case 2                 | 3.2±1.7    | 3.4±1.4    | 23.9±3.3   | 25.3±1.9   | 73.6±11.6  | 69.4±6.0   |
| Case 3                 | 3.8±1.4    | 3.8±1.4    | 29.3±2.7   | 30.3±2.0   | 55.9±10.4  | 51.8±7.3   |
| Case 4                 | 1.1±0.3    | 1.1±0.3    | 30.6±3.4   | 30.5±3.0   | 59.9±12.5  | 60.8±10.7  |
| Case 5                 | 1.5±0.7    | 1.6±0.7    | 20.8±4.0   | 21.0±3.3   | 51.5±19.0  | 50.9±16.6  |
| Case 6                 | 1.8±0.8    | 1.9±0.6    | 23.1±2.9   | 23.9±2.0   | 53.4±9.4   | 49.9±5.9   |
| Average                | 2.2±1.3    | 2.3±1.3    | 23.9±4.8   | 24.7±4.3   | 57.3±15.9  | 55.0±12.8  |

**Table S5.** The correlation between O<sub>3</sub> and HONO (or NO<sub>2</sub>) in each double low case during daytime.

| Double Low Case |                | HONO       |            | NO <sub>2</sub> |            |
|-----------------|----------------|------------|------------|-----------------|------------|
|                 |                | 6:00–18:00 | 8:00–16:00 | 6:00–18:00      | 8:00–16:00 |
| Case I          | O <sub>3</sub> | -0.749**   | -0.830**   | -0.857**        | -0.898**   |
| Case II         | O <sub>3</sub> | -0.790**   | -0.731**   | -0.618**        | -0.374     |
| Case III        | O <sub>3</sub> | -0.721**   | -0.754**   | -0.552**        | -0.559**   |

\*\* with significant value at  $p < 0.01$ .



**Table S6.** Summary of the concentration data of HONO, O<sub>3</sub>, and aerosol species in each double low case during the daytime.

| Double Low Case | O <sub>3</sub> (μg/m <sup>3</sup> ) |            | HONO (μg/m <sup>3</sup> ) |            |
|-----------------|-------------------------------------|------------|---------------------------|------------|
|                 | 6:00–18:00                          | 8:00–16:00 | 6:00–18:00                | 8:00–16:00 |
| Case I          | 63.2±30.7                           | 68.9±33.1  | 2.22±1.14                 | 2.11±1.14  |
| Case II         | 70.2±21.3                           | 76.0±15.5  | 1.10±0.87                 | 0.93±0.60  |
| Case III        | 73.2±27.6                           | 77.8±28.5  | 1.49±1.09                 | 1.42±1.06  |
| Average         | 71.4±27.0                           | 76.4±27.2  | 1.51±1.10                 | 1.42±1.05  |

| Double Low Case | SO <sub>4</sub> <sup>2-</sup> (μg/m <sup>3</sup> ) |            | NO <sub>3</sub> <sup>-</sup> (μg/m <sup>3</sup> ) |            | SIA (μg/m <sup>3</sup> ) |             | PM <sub>2.5</sub> (μg/m <sup>3</sup> ) |            |
|-----------------|----------------------------------------------------|------------|---------------------------------------------------|------------|--------------------------|-------------|----------------------------------------|------------|
|                 | 6:00–18:00                                         | 8:00–16:00 | 6:00–18:00                                        | 8:00–16:00 | 6:00–18:00               | 8:00–16:00  | 6:00–18:00                             | 8:00–16:00 |
| Case I          | 6.52±3.06                                          | 6.92±2.94  | 7.17±4.48                                         | 7.57±4.69  | 17.64±9.74               | 18.64±9.79  | 30.2±16.6                              | 31.8±16.8  |
| Case II         | 6.32±1.76                                          | 6.25±1.91  | 10.38±9.04                                        | 10.59±9.52 | 21.83±13.63              | 21.98±14.30 | 39.3±21.2                              | 39.3±21.6  |
| Case III        | 8.25±4.50                                          | 8.21±3.19  | 12.94±9.84                                        | 12.71±9.07 | 28.92±17.44              | 28.52±15.01 | 46.0±25.1                              | 45.7±20.6  |
| Average         | 7.68±4.05                                          | 7.69±3.06  | 11.75±9.37                                        | 11.68±8.86 | 26.20±16.50              | 26.09±14.74 | 42.7±24.0                              | 42.8±20.8  |

**Table S7.** The correlations between the daytime HONO and aerosol species (i.e. SO<sub>4</sub><sup>2-</sup>, NO<sub>3</sub><sup>-</sup>, SIA, and PM<sub>2.5</sub>) during the double high episodes.

| Double High Case |      | SO <sub>4</sub> <sup>2-</sup> |            | NO <sub>3</sub> <sup>-</sup> |            | SIA        |            | PM <sub>2.5</sub> |            |
|------------------|------|-------------------------------|------------|------------------------------|------------|------------|------------|-------------------|------------|
|                  |      | 6:00–18:00                    | 8:00–16:00 | 6:00–18:00                   | 8:00–16:00 | 6:00–18:00 | 8:00–16:00 | 6:00–18:00        | 8:00–16:00 |
| Case 1           | HONO | -0.887**                      | -0.595     | 0.882**                      | 0.877**    | 0.664*     | 0.775*     | -0.254            | 0.145      |
| Case 2           | HONO | -0.963**                      | -0.946**   | -0.435                       | -0.011     | -0.902**   | -0.802**   | -0.928**          | -0.865**   |
| Case 3           | HONO | -0.799**                      | -0.733**   | 0.967**                      | 0.935*     | 0.467      | 0.364      | -0.016            | -0.144     |
| Case 4           | HONO | -0.630*                       | -0.356     | -0.566*                      | -0.339     | -0.671*    | -0.389     | -0.643*           | -0.361     |
| Case 5           | HONO | 0.400*                        | 0.492**    | 0.714**                      | 0.674**    | 0.652**    | 0.643**    | 0.494**           | 0.552**    |
| Case 6           | HONO | -0.103                        | 0.219      | 0.598**                      | 0.700**    | 0.414*     | 0.569*     | 0.288             | 0.550*     |

\* with significant value at  $p < 0.05$ . \*\* with significant value at  $p < 0.01$ .
